# Supplementary material
Source: PubMed Central journal article supplement (PMC2694685)
Supplement: supp_ddp164_ddp164supp.pdf [file supp_ddp164_ddp164supp.pdf]

**Supplement 1. Non-significant changes of developmental markers in HPRT-deficient MN9D cells**

| Gene            | AG2    | AG5    | AG6    | AG8    | AG10   | TG1    | TG2    | TG3    | TG4    | TG5    | Overall Change | t-test |
|-----------------|--------|--------|--------|--------|--------|--------|--------|--------|--------|--------|----------------|--------|
| <b>Catenin</b>  | 73±5   | 91±3   | 94±28  | 45±0   | 33±5   | 27±19  | 18±0   | 38±27  | 36±8   | 17±9   | <b>47±9</b>    | p=0.05 |
| <b>Cdc42</b>    | 77±11  | 56±6   | 83±5   | 76±8   | -20±6  | 18±7   | -8±3   | 9±5    | 48±2   | 28±2   | <b>37±12</b>   | p=0.03 |
| <b>Efnb2</b>    | -65±12 | -70±1  | 25±3   | -21±3  | -73±13 | -11±3  | -37±1  | -8±7   | -3±1   | -12±4  | <b>-28±10</b>  | p=0.26 |
| <b>Eno2</b>     | 37±10  | 3±2    | 35±6   | 58±9   | -48±3  | 89±11  | -10±5  | -29±1  | 20±3   | -65±2  | <b>9±15</b>    | p=0.54 |
| <b>Frizzled</b> | -65±0  | -47±4  | -36±0  | -43±10 | 107±17 | -61±4  | -43±0  | -48±4  | -76±9  | -36±2  | <b>-35±16</b>  | p=0.37 |
| <b>Groucho</b>  | 47±11  | 75±6   | 100±9  | 56±3   | 51±5   | 45±0   | 28±4   | 23±5   | 188±68 | 36±2   | <b>63±16</b>   | p=0.15 |
| <b>Msx1</b>     | -9±7   | -2±5   | -17±2  | -46±3  | -29±11 | 217±33 | 333±42 | 325±27 | -17±17 | 690±30 | <b>144±77</b>  | p=0.06 |
| <b>N-wasp</b>   | 38±2   | 16±5   | 17±5   | 8±4    | -6±1   | -11±3  | -27±1  | -9±4   | 31±2   | -15±3  | <b>4±7</b>     | p=0.62 |
| <b>Nkx6-1</b>   | -58±11 | 171±14 | 109±26 | 192±6  | 49±21  | -67±4  | -62±7  | 15±1   | -43±4  | -34±8  | <b>26±31</b>   | p=0.51 |
| <b>Ntrk3</b>    | -5±4   | 111±7  | 306±20 | 101±19 | 75±5   | 35±3   | -35±5  | 38±4   | -32±5  | 3±4    | <b>60±32</b>   | p=0.13 |
| <b>Nurr1</b>    | -39±4  | 77±11  | 3±1    | -19±5  | 28±3   | 46±9   | 54±5   | 12±0   | 15±6   | -33±5  | <b>13±12</b>   | p=0.29 |
| <b>Rac1</b>     | 40±5   | -27±1  | -1±3   | 26±6   | 2±2    | 3±3    | -18±1  | 16±4   | 28±4   | -13±1  | <b>5±7</b>     | p=0.53 |
| <b>Tiam1</b>    | 54±14  | 37±6   | 88±4   | -9±4   | 9±4    | 21±2   | 12±1   | -14±5  | 26±6   | -19±3  | <b>19±11</b>   | p=0.12 |
| <b>Wnt1</b>     | 234±31 | -17±13 | -82±1  | -73±1  | -77±4  | -78±2  | -62±8  | 7±12   | -59±5  | 42±15  | <b>-16±31</b>  | p=0.60 |

The results for each mRNA in each cell line were determined in quadruplicate by qPCR and normalized to a simultaneously processed control mRNA, *My16* (myosin light polypeptide 6), where the raw data showed little variation among cell lines. Results from the HPRT lines are presented as percent changes relative to a simultaneously processed sample of the HPRT<sup>+</sup> parent line. The overall change reflects the aggregate results of all the HPRT lines combined. The results for all 10 HPRT<sup>-</sup> MN9D cell lines were compared as a group against the parent MN9D line via single-sample t-test test. A Bonferroni correction for the 29 simultaneous comparisons in this Table and Table 2 was used to define p<0.002 as a conservative estimate for statistical significance. Values of 0.002<p<0.05 were considered borderline.

**Supplement 2. Primers and conditions for qPCR validation**

| ID        | Gene    | Product                                                        | Primer | Sequence                 | Tm (°C) | Amplicon length (bp) |
|-----------|---------|----------------------------------------------------------------|--------|--------------------------|---------|----------------------|
| NM_009630 | Adora2a | A2a adenosine receptor                                         | Fwd    | GCCATCCCATTTCGCCATCA     | 71,5    | 122                  |
|           |         |                                                                | Rev    | GCAATAGCCAAGAGGCTGAAGA   | 66,5    |                      |
| NM_009633 | Adra2b  | Adrenergic receptor alpha2b                                    | Fwd    | TCTTCACCATTTTCGGCAATGC   | 69,8    | 121                  |
|           |         |                                                                | Rev    | AGAGTAGCCACTAGGATGTCG    | 59,9    |                      |
| NM_145429 | Arrb2   | Arrestin-beta2                                                 | Fwd    | GGCAAGCGCGACTTTGTAG      | 65,8    | 107                  |
|           |         |                                                                | Rev    | GTGAGGGTCACGAACACTTTC    | 63,5    |                      |
| NM_009781 | Cacna1c | Calcium channel, voltage dependent, L type, alpha 1C subunit   | Fwd    | GGATGCAAGACGCTATGGG      | 65,5    | 105                  |
|           |         |                                                                | Rev    | CGCTCAAAACACCGAGAACC     | 66,8    |                      |
| NM_007595 | Camk2b  | Calcium/calmodulin dependent protein kinase II beta            | Fwd    | CTACGGCAAACCTGTGGACAT    | 65,9    | 124                  |
|           |         |                                                                | Rev    | ATACGCCCCAGCCTTGATCT     | 66,7    |                      |
| NM_009793 | Camk4   | Calcium/calmodulin dependent protein kinase IV                 | Fwd    | GAGAACCTCGTCCCGGATTAC    | 65,7    | 106                  |
|           |         |                                                                | Rev    | ACACAATGGATGTAGCACCCC    | 65,7    |                      |
| NM_021369 | Chrna6  | Cholinergic receptor, nicotinic, alpha polypeptide 6           | Fwd    | TCACGGTGCATTTTGAATTGGC   | 70,7    | 103                  |
|           |         |                                                                | Rev    | TAGTCCTCCAGATGTGACGC     | 64,1    |                      |
| NM_009602 | Chrn2   | Cholinergic receptor, nicotinic, beta polypeptide 2 (neuronal) | Fwd    | GAGGTGAAGCACTTCCCATT     | 64,1    | 104                  |
|           |         |                                                                | Rev    | GCCACATCGCTTTTGAGCAC     | 68,0    |                      |
| NM_016886 | Gria3   | Glutamate receptor ionotropic ampa3                            | Fwd    | ATTTGAACTACCACGTAGACCAC  | 60,7    | 101                  |
|           |         |                                                                | Rev    | TCCAAAGATAGCATAACCCCCT   | 63,3    |                      |
| NM_008168 | Grik5   | Glutamate receptor ionotropic kainate 5                        | Fwd    | CTGCCAAGGGGGTTGTATC      | 67,5    | 100                  |
|           |         |                                                                | Rev    | TGATGTGGGGAATCTCCTTCT    | 64,6    |                      |
| NM_013556 | m-Hprt  | mouse Hypoxanthine-guanine Phosphoribosyltransferase           | Fwd    | GTTAAGCAGTACAGCCCCAAA    | 62,8    | 131                  |
|           |         |                                                                | Rev    | AGGGCATATCCAACAACAACACTT | 64,3    |                      |
| NM_000194 | h-Hprt  | human Hypoxanthine-guanine Phosphoribosyltransferase           | Fwd    | TGGACAGGACTGAACGTCTTG    | 65,3    | 111                  |
|           |         |                                                                | Rev    | CCAGCAGGTCAGCAAAGAATTTA  | 66,1    |                      |
| NM_008478 | L1cam   | L1 cell adhesion molecule                                      | Fwd    | AAAGGTGCAAGGGTGACATTC    | 65,0    | 104                  |
|           |         |                                                                | Rev    | TCCCCACGTTCTGTAGGT       | 64,4    |                      |
| NM_008712 | Nos1    | Nitric oxide synthase 1, neuronal                              | Fwd    | AATGATCGGCCCTGGTAGA      | 67,6    | 170                  |
|           |         |                                                                | Rev    | TGGGTCACACGGATGGTCT      | 66,7    |                      |
| NM_007452 | Prdx3   | Peroxisome oxidoreductin 3                                     | Fwd    | TTAGCACCAAGTTCCTCTTTCCA  | 64,7    | 115                  |
|           |         |                                                                | Rev    | CCCTTAAAGTCGTCGAGACTCAG  | 65,0    |                      |
| NM_009217 | Sstr2   | Somatostatin receptor 2                                        | Fwd    | TACATCTTCAACGTCTTCCGT    | 63,7    | 196                  |
|           |         |                                                                | Rev    | CGGATTGTGAATTGTCTGCCT    | 66,1    |                      |
| NM_009377 | Th      | Tyrosine hydroxylase                                           | Fwd    | CTGTCTCGGGCTTTGAAAGTG    | 65,9    | 163                  |
|           |         |                                                                | Rev    | GACGCACAGAAGTGGAGG       | 65,1    |                      |

**Supplement 3. Neurodevelopmental markers quantification: Primers and conditions for qPCR**

| ID        | Gene       | Product                                                           | Primer | Sequence               | Tm (°C) | Amplicon length (bp) |
|-----------|------------|-------------------------------------------------------------------|--------|------------------------|---------|----------------------|
| NM_007614 | Catenin    | Catenin (cadherin associated protein), beta 1                     | Fwd    | CCCAGTCCTTCACGCAAGAG   | 67,1    | 102                  |
|           |            |                                                                   | Rev    | CATCTAGCGTCTCAGGGAACA  | 64,2    |                      |
| NM_009861 | Cdc42      | Cell division cycle 42                                            | Fwd    | CCTTTCTTGCTTGTGGGACC   | 66,7    | 232                  |
|           |            |                                                                   | Rev    | GGCTCTTCTTCGGTTCTGGAG  | 66,3    |                      |
| NM_010111 | Efnb2      | Ephrin B2                                                         | Fwd    | AATCCAGGTTCTAGCACCGAT  | 63,6    | 159                  |
|           |            |                                                                   | Rev    | TCTCCTGCGGTACTTGAGCA   | 66,0    |                      |
| NM_010133 | m-En1      | mouse Engrailed-1                                                 | Fwd    | ACACAACCCTGCGATCCTACT  | 64,7    | 120                  |
|           |            |                                                                   | Rev    | GGACGGTCCGAATAGCGTG    | 67,7    |                      |
| NM_010134 | m-En2      | mouse Engrailed-2                                                 | Fwd    | AAGACGCTATCACTTCACGGT  | 62,6    | 188                  |
|           |            |                                                                   | Rev    | CGCGTGACAGTAGACCCAAG   | 66,9    |                      |
| NM_001426 | h-En1      | human Engrailed-1                                                 | Fwd    | GAGCGCAGGGCACCAAATA    | 68,3    | 138                  |
|           |            |                                                                   | Rev    | AATAACGTGTGCAGTACACCC  | 61,3    |                      |
| NM_001427 | h-En2      | human Engrailed-2                                                 | Fwd    | CCGGCGTGCGTCTACTGTA    | 66,0    | 101                  |
|           |            |                                                                   | Rev    | GGCCGCTTGTCTCTTTGTT    | 67,5    |                      |
| NM_013509 | Eno2       | Enolase 2                                                         | Fwd    | GTCCCTGGCCGTGTGTAAG    | 65,5    | 200                  |
|           |            |                                                                   | Rev    | CATCCCGAAAGCTCTCAGC    | 65,0    |                      |
| NM_021457 | Frizzled-1 | Frizzled 1                                                        | Fwd    | GTGGAGCGGGGAAAGTTCTC   | 67,1    | 115                  |
|           |            |                                                                   | Rev    | CGTAAACCTTGGTGGGTTTCG  | 66,2    |                      |
| NM_011599 | Groucho    | Tle1 (transducin-like enhancer of split 1)                        | Fwd    | TGCAAGCCCAACACACTCA    | 66,8    | 143                  |
|           |            |                                                                   | Rev    | TTTCATGCAGGCTCACTTCTTT | 64,8    |                      |
| NM_010592 | Jund1      | Jun proto-oncogene related gene d1                                | Fwd    | GGCGGGATTGAAACCAGGG    | 70,7    | 147                  |
|           |            |                                                                   | Rev    | AGCCCGTTGGACTGGATGA    | 68,0    |                      |
| NM_010453 | Hoxa5      | Homeo box A5                                                      | Fwd    | CTCATTTTGCAGGTCGCTATCC | 67,5    | 139                  |
|           |            |                                                                   | Rev    | ATCCATGCCATTGTAGCCGTA  | 66,1    |                      |
| NM_010725 | Lmx1b      | LIM homeobox transcription factor 1 beta                          | Fwd    | TTCCTGATGCGAGTCAACGAG  | 67,6    | 100                  |
|           |            |                                                                   | Rev    | TCCGATCCCGGAAGTAGCAG   | 68,4    |                      |
| NM_010835 | Msx1       | Msh-like 1 homeo box                                              | Fwd    | CTCATGGCCGATCACAGGAAG  | 69,0    | 175                  |
|           |            |                                                                   | Rev    | GGAGTCCTCCGACTGAGAAATG | 66,1    |                      |
| NM_013601 | Msx2       | Msh-like 2 homeo box                                              | Fwd    | TTCACCACATCCCAGCTTCTA  | 64,5    | 159                  |
|           |            |                                                                   | Rev    | TTGCAGTCTTTTCGCCTTAGC  | 65,4    |                      |
| NM_010860 | Myf6       | Myosin, light polypeptide 6, alkali, smooth muscle and non-muscle | Fwd    | CCAGTGTGGGGATGTGATGC   | 68,9    | 226                  |
|           |            |                                                                   | Rev    | ATGACGGATTTTCAGCACCCAT | 67,5    |                      |
| NM_028459 | N-wasp     | Wiskott-Aldrich syndrome-like                                     | Fwd    | CCTGCCTTCTGATGGTGACC   | 67,0    | 145                  |
|           |            |                                                                   | Rev    | TAAAAGCGCATCCCTCCTGA   | 67,6    |                      |

| ID        | Gene   | Product                                         | Primer | Sequence                | Tm (°C) | Amplicon length (bp) |
|-----------|--------|-------------------------------------------------|--------|-------------------------|---------|----------------------|
| NM_009718 | Ngn2   | Neurogenin 2                                    | Fwd    | AACTCCACGTCCCCATACAG    | 63,7    | 103                  |
|           |        |                                                 | Rev    | GAGGCGCATAACGATGCTTCT   | 67,4    |                      |
| NM_144955 | Nkx6-1 | NK6 transcription factor related, locus 1       | Fwd    | CAGACCCACGTTCTCTGGAC    | 64,8    | 125                  |
|           |        |                                                 | Rev    | TGACCTGACTCTCCGTCATCC   | 66,6    |                      |
| NM_013613 | Nr4a2  | Nuclear receptor subfamily 4, group A, member 2 | Fwd    | AACACTGAAATTACTGCCACCA  | 63,2    | 138                  |
|           |        |                                                 | Rev    | TTCTACCTTAATGGAGGACTGCT | 61,8    |                      |
| NM_008746 | Ntrk3  | Neurotrophic tyrosine kinase, receptor, type 3  | Fwd    | TCCACATCGCCAGTCAGATAG   | 65,1    | 135                  |
|           |        |                                                 | Rev    | TGGACATGCCAAAATCTCCAAT  | 67,2    |                      |
| NM_033620 | Pard3  | Par-3 (partitioning defective 3)                | Fwd    | TCAAGCCACAAGTCAAATTGAGG | 67,1    | 103                  |
|           |        |                                                 | Rev    | AGTGGAAAGGCCAGTTAAAGC   | 63,2    |                      |
| NM_008782 | Pax5   | Paired box gene 5                               | Fwd    | AAGGATAGTGGAACTTGCCCA   | 64,5    | 112                  |
|           |        |                                                 | Rev    | TCCTGTCTCATAATACCTGCCA  | 63,2    |                      |
| NM_008852 | Pitx3  | Paired-like homeodomain transcription factor 3  | Fwd    | CCTACGAGGAGGTGTACCCG    | 65,6    | 110                  |
|           |        |                                                 | Rev    | CACGTTGACCGAGTTGAAGG    | 65,6    |                      |
| NM_009007 | Rac1   | RAS-related C3 botulinum substrate 1            | Fwd    | TTTCCCTTGTGAGTCCTGCAT   | 65,7    | 103                  |
|           |        |                                                 | Rev    | TTCGTCCCCACGAGGATGATA   | 68,6    |                      |
| NM_133223 | Rac3   | RAS-related C3 botulinum substrate 3            | Fwd    | GCCAACGTGATGGTGGATG     | 67,6    | 89                   |
|           |        |                                                 | Rev    | GAGAGTGGCCGAAGCCTAT     | 63,2    |                      |
| NM_024457 | Rap1b  | RAS related protein 1b                          | Fwd    | AAGGCTTCGCTCTGGTTTACT   | 63,0    | 181                  |
|           |        |                                                 | Rev    | CTTGCTAGGTTCTGACCTTGTTT | 62,9    |                      |
| NM_016802 | RhoA   | Ras homolog gene family, member A               | Fwd    | GAGTTGGCTTTATGGGACACA   | 63,7    | 143                  |
|           |        |                                                 | Rev    | GGAGTCCATTTTTCTGGGATGTT | 65,9    |                      |
| NM_009170 | Shh    | Sonic hedgehog                                  | Fwd    | AAAGCTGACCCCTTTAGCCTA   | 62,8    | 103                  |
|           |        |                                                 | Rev    | TTCGGAGTTTCTTGTGATCTTCC | 65,3    |                      |
| NM_009384 | Tiam1  | T-cell lymphoma invasion and metastasis 1       | Fwd    | GAAGCACACTTCACGCTCC     | 63,7    | 154                  |
|           |        |                                                 | Rev    | CTCCAGGCCATTTTCAGCCA    | 69,4    |                      |
| NM_021279 | Wnt1   | Wingless-related MMTV integration site 1        | Fwd    | CGACTGATCCGACAGAACCC    | 67,0    | 149                  |
|           |        |                                                 | Rev    | CGGTTGACGATCTTGCCGAA    | 70,4    |                      |
| NM_009524 | Wnt5   | Wingless-related MMTV integration site 5        | Fwd    | AGCCTGTAAGTGTGATGGAGT   | 60,2    | 115                  |
|           |        |                                                 | Rev    | CGCGGCGCTATCATACTTCT    | 66,2    |                      |
